# Supplementary material for: Lung Fibrosis Is Improved by Extracellular Vesicles from IFNγ-Primed Mesenchymal Stromal Cells in Murine Systemic Sclerosis
Source: MDPI journal article supplement (doi:10.3390/cells10102727), 2021-10-13
Supplement: s1 [file s1]

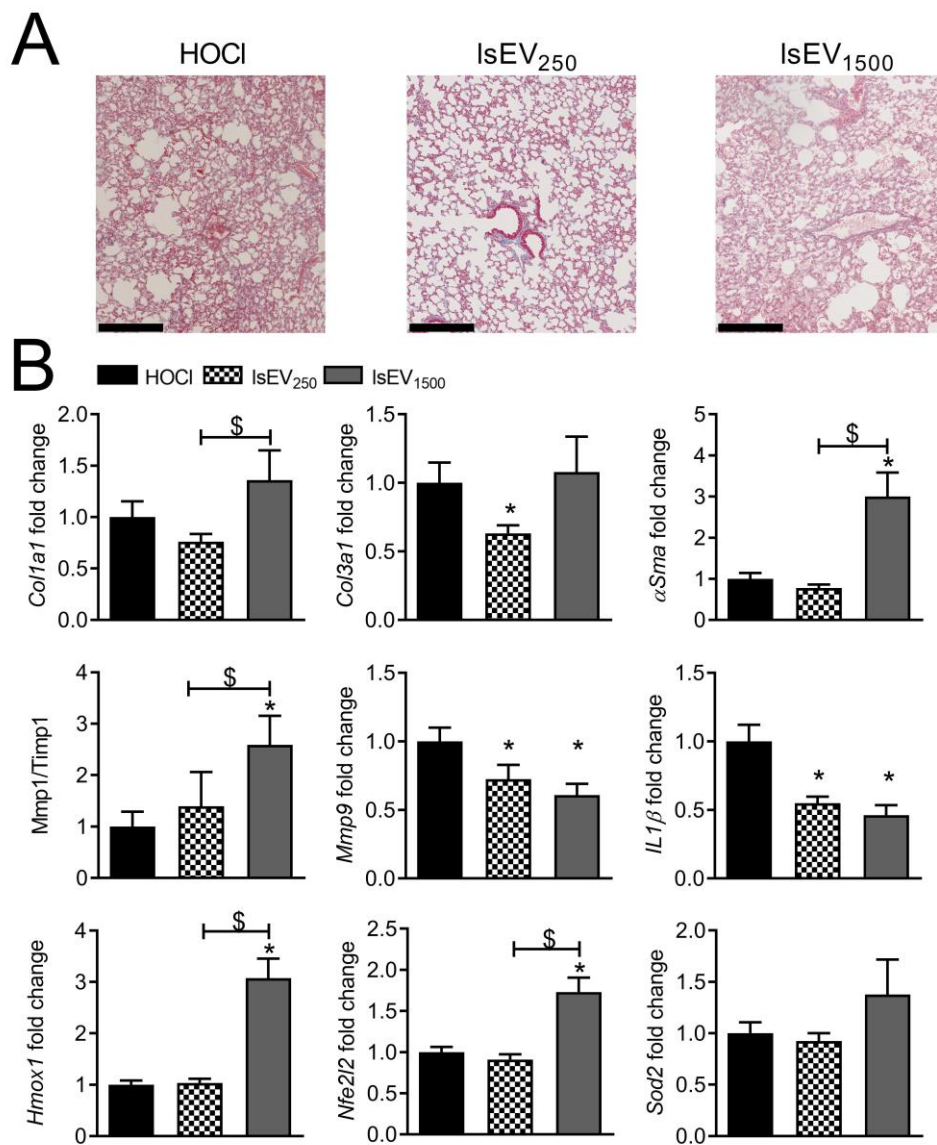

**Supl Figure 1.** Dose effect of IsEVs isolated from MSCs in the murine model of HOCI-induced SSc. **(A)**

Photographs of representative histological sections of lungs after Masson's trichrome staining in control mice

(HOCI) and mice that have been injected with 250 or 1500 ng of large size extracellular vesicles (IsEV<sub>250</sub> or

IsEV<sub>1500</sub>, respectively) (scale bar, 250  $\mu$ m). **(B)** Gene expression in lung samples as expressed as fold change in

treated versus HOCI control mice. Data are presented as mean  $\pm$  SEM (n=8 to 12 per group; \*: p<0.05 versus

control or \$: p<0.05 versus the indicated group of mice).
